# Supplementary material
Source: Elsevier journal article supplement (https://www.sciencedirect.com/science/article/pii/S1885585726000046)
Supplement: mmc1 [file mmc1.pdf]

## Supplementary data

### Calculation of CACS-CL

In a first step, the risk factor-weighted clinical likelihood (RF\_CL) was calculated for each patient as described in the main document and the ESC 2024 guidelines.<sup>1</sup> This value was then used with the following formula from Winther et al.<sup>2</sup>

$$0.0013 + (RF\_CL * 0.2021) + (cacs\_1\_9*0.0082) + (cacs\_10\_99*0.0238) + (cacs\_100\_399*0.1131) + (cacs\_400\_999*0.2306) + (cacs\_1000*0.4040) + (RF\_PTP*cacs\_1\_9*0.1311) + (RF\_PTP*cacs\_10\_99*0.2909) + (RF\_PTP*cacs\_100\_399*0.4077) + (RF\_PTP*cacs\_400\_999*0.4658) + (RF\_PTP*cacs\_1000*0.4489)$$

**Table S1.** Net reclassification improvement using algorithm 2 for small ischemia

| Small ischemia: NRI 0.2571 (0.1969-0.3173), $P < .001$ |                              |                         |                        |                              |                          |       |
|--------------------------------------------------------|------------------------------|-------------------------|------------------------|------------------------------|--------------------------|-------|
| Ischemia (SDS $\geq 2$ )                               |                              | Algorithm 2             |                        |                              |                          | Total |
|                                                        |                              | very low ( $\geq 5\%$ ) | low ( $> 5\% - 15\%$ ) | moderate ( $> 15\% - 50\%$ ) | high ( $> 50\% - 85\%$ ) |       |
| RF-CL                                                  | very low (0%-5%)             | 26                      | 0                      | 0                            | 0                        | 26    |
|                                                        | low ( $> 5\% - 15\%$ )       | 10                      | 18                     | 97                           | 5                        | 130   |
|                                                        | moderate ( $> 15\% - 50\%$ ) | 0                       | 0                      | 198                          | 0                        | 198   |
|                                                        | high ( $> 50\% - 85\%$ )     | 0                       | 0                      | 0                            | 0                        | 0     |
|                                                        | Total                        | 36                      | 18                     | 295                          | 5                        | 354   |
| No ischemia                                            |                              | Algorithm 2             |                        |                              |                          | Total |
|                                                        |                              | very low ( $\geq 5\%$ ) | low ( $> 5\% - 15\%$ ) | moderate ( $> 15\% - 50\%$ ) | high ( $> 50\% - 85\%$ ) |       |
| RF-CL                                                  | very low (0%-5%)             | 369                     | 0                      | 0                            | 0                        | 369   |
|                                                        | low ( $> 5\% - 15\%$ )       | 248                     | 150                    | 248                          | 4                        | 650   |
|                                                        | moderate ( $> 15\% - 50\%$ ) | 0                       | 0                      | 419                          | 0                        | 419   |
|                                                        | high ( $> 50\% - 85\%$ )     | 0                       | 0                      | 0                            | 0                        | 0     |
|                                                        | Total                        | 617                     | 150                    | 667                          | 4                        | 1438  |

CACS-CL, coronary artery calcium score + risk factor-weighted likelihood; RF-CL, risk factor-weighted clinical likelihood; SDS, summed difference score.

Algorithm 2 used only CACS-CL for reclassification of patients with a low clinical likelihood ( $> 5\% - 15\%$ ). With RF-CL as a reference, using algorithm 2 in patients with small ischemia (upper table), 102 (28.8%) patients were correctly reclassified to a higher probability. Ten patients (2.8%) were incorrectly reclassified to a lower probability.

In patients without ischemia (lower table), 248 (17.2%) patients were correctly reclassified to a very low probability, and 252 (17.5%) patients incorrectly to a higher probability. The NRI was 0.2571 (0.1969-0.3173,  $P < .001$ ) in favor of algorithm 2.

**Table S2.** Net reclassification improvement using algorithm 2 for relevant ischemia

| Relevant ischemia: NRI 0.2331 (0.1582 - 0.308), $P < .001$ |                              |                         |                        |                              |                          |       |
|------------------------------------------------------------|------------------------------|-------------------------|------------------------|------------------------------|--------------------------|-------|
| Ischemia (SDS $\geq 7$ )                                   |                              | Algorithm 2             |                        |                              |                          | Total |
|                                                            |                              | very low ( $\geq 5\%$ ) | low ( $> 5\% - 15\%$ ) | moderate ( $> 15\% - 50\%$ ) | high ( $> 50\% - 85\%$ ) |       |
| RF-CL PTP<br>2024                                          | very low (0%-5%)             | 11                      | 0                      | 0                            | 0                        | 11    |
|                                                            | low ( $> 5\% - 15\%$ )       | 1                       | 5                      | 41                           | 4                        | 51    |
|                                                            | moderate ( $> 15\% - 50\%$ ) | 0                       | 0                      | 104                          | 0                        | 104   |
|                                                            | high ( $> 50\% - 85\%$ )     | 0                       | 0                      | 0                            | 0                        | 0     |
|                                                            | Total                        | 12                      | 5                      | 145                          | 4                        | 166   |
| No ischemia                                                |                              | Algorithm 2             |                        |                              |                          | Total |
|                                                            |                              | very low ( $\geq 5\%$ ) | low ( $> 5\% - 15\%$ ) | moderate ( $> 15\% - 50\%$ ) | high ( $> 50\% - 85\%$ ) |       |
| RF-CL PTP<br>2024                                          | very low (0%-5%)             | 384                     | 0                      | 0                            | 0                        | 384   |
|                                                            | low ( $> 5\% - 15\%$ )       | 257                     | 163                    | 304                          | 5                        | 729   |
|                                                            | moderate ( $> 15\% - 50\%$ ) | 0                       | 0                      | 513                          | 0                        | 513   |
|                                                            | high ( $> 50\% - 85\%$ )     | 0                       | 0                      | 0                            | 0                        | 0     |
|                                                            | Total                        | 641                     | 163                    | 817                          | 5                        | 1626  |

CACS-CL, coronary artery calcium score + risk factor-weighted likelihood; RF-CL, risk factor-weighted clinical likelihood; SDS, summed difference score.

Algorithm 2 only used CACS-CL for reclassification of patients with a low likelihood ( $> 5\% - 15\%$ ). With RF-CL as a reference, using algorithm 2 in patients with relevant ischemia (upper table), 45 (27.1%) patients were correctly reclassified to a higher probability. One patient (0.6%) was incorrectly moved to a lower probability.

In patients without relevant ischemia (lower table), 257 (15.8%) patients were correctly reclassified to very a low probability, and 309 (19.0%) patients incorrectly to a higher probability. The NRI was 0.2331 (0.1582-0.308,  $P < .001$ ), in favor of algorithm 2.

**Table S3.** Reclassification using algorithm 3 for small ischemia

| Small ischemia: NRI 0.4954 (0.4173 - 0.5735), $p < 0.001$ |                                |                         |                          |                                |                            |       |
|-----------------------------------------------------------|--------------------------------|-------------------------|--------------------------|--------------------------------|----------------------------|-------|
| Ischemia (SDS $\geq 2$ )                                  |                                | Algorithm 3 (CACS-CL)   |                          |                                |                            | Total |
|                                                           |                                | very low ( $\geq 5\%$ ) | low ( $> 5\%$ - $15\%$ ) | moderate ( $> 15\%$ - $50\%$ ) | high ( $> 50\%$ - $85\%$ ) |       |
| RF-CL                                                     | very low (0%-5%)               | 13                      | 4                        | 9                              | 0                          | 26    |
|                                                           | low ( $> 5\%$ - $15\%$ )       | 10                      | 18                       | 97                             | 5                          | 130   |
|                                                           | moderate ( $> 15\%$ - $50\%$ ) | 1                       | 21                       | 91                             | 85                         | 198   |
|                                                           | high ( $> 50\%$ - $85\%$ )     | 0                       | 0                        | 0                              | 0                          | 0     |
|                                                           | Total                          | 24                      | 43                       | 197                            | 90                         | 354   |
| No ischemia                                               |                                | Algorithm 3 (CACS-CL)   |                          |                                |                            | Total |
|                                                           |                                | very low ( $\geq 5\%$ ) | low ( $> 5\%$ - $15\%$ ) | moderate ( $> 15\%$ - $50\%$ ) | high ( $> 50\%$ - $85\%$ ) |       |
| RF-CL                                                     | very low (0%-5%)               | 310                     | 43                       | 16                             | 0                          | 369   |
|                                                           | low ( $> 5\%$ - $15\%$ )       | 248                     | 150                      | 248                            | 4                          | 650   |
|                                                           | moderate ( $> 15\%$ - $50\%$ ) | 36                      | 117                      | 206                            | 60                         | 419   |
|                                                           | high ( $> 50\%$ - $85\%$ )     | 0                       | 0                        | 0                              | 0                          | 0     |
|                                                           | Total                          | 594                     | 310                      | 470                            | 64                         | 1438  |

CACS-CL, coronary artery calcium score + risk factor-weighted likelihood; RF-CL, risk factor-weighted clinical likelihood; SDS, summed difference score.

Algorithm 3 used CACS-CL for reclassification of patients. With RF-CL as a reference, using algorithm 3 (CACS-CL) in patients with small ischemia (upper table), 200 (56.5%) patients were correctly reclassified to a higher probability. Thirty-two patients (9.0%) were incorrectly reclassified to a lower probability.

In patients without ischemia (lower table), 401 (27.9%) patients were correctly reclassified to a lower probability, and 371 (25.8%) patients incorrectly to a higher probability. The NRI was 0.4954 (0.4173-0.5735,  $P < .001$ ) in favor of algorithm 3.

**Table S4.** Reclassification using algorithm 3 for relevant ischemia

| Relevant ischemia: NRI 0.5724 (0.4771-0.6677), $P < .001$ |                                |                         |                          |                                |                            |       |
|-----------------------------------------------------------|--------------------------------|-------------------------|--------------------------|--------------------------------|----------------------------|-------|
| Ischemia (SDS $\geq 7$ )                                  |                                | Algorithm 3 (CACS-CL)   |                          |                                |                            | Total |
|                                                           |                                | very low ( $\geq 5\%$ ) | low ( $> 5\%$ - $15\%$ ) | moderate ( $> 15\%$ - $50\%$ ) | high ( $> 50\%$ - $85\%$ ) |       |
| RF-CL                                                     | very low (0%-5%)               | 4                       | 1                        | 6                              | 0                          | 11    |
|                                                           | low ( $> 5\%$ - $15\%$ )       | 1                       | 5                        | 41                             | 4                          | 51    |
|                                                           | moderate ( $> 15\%$ - $50\%$ ) | 0                       | 7                        | 42                             | 55                         | 104   |
|                                                           | high ( $> 50\%$ - $85\%$ )     | 0                       | 0                        | 0                              | 0                          | 0     |
|                                                           | Total                          | 5                       | 13                       | 89                             | 59                         | 166   |
| No ischemia                                               |                                | Algorithm 3 (CACS-CL)   |                          |                                |                            | Total |
|                                                           |                                | very low ( $\geq 5\%$ ) | low ( $> 5\%$ - $15\%$ ) | moderate ( $> 15\%$ - $50\%$ ) | high ( $> 50\%$ - $85\%$ ) |       |
| RF-CL                                                     | very low (0%-5%)               | 319                     | 46                       | 19                             | 0                          | 384   |
|                                                           | low ( $> 5\%$ - $15\%$ )       | 257                     | 163                      | 304                            | 5                          | 729   |
|                                                           | moderate ( $> 15\%$ - $50\%$ ) | 37                      | 131                      | 255                            | 90                         | 513   |
|                                                           | high ( $> 50\%$ - $85\%$ )     | 0                       | 0                        | 0                              | 0                          | 0     |
|                                                           | Total                          | 613                     | 340                      | 578                            | 95                         | 1626  |

CACS-CL, coronary artery calcium score + risk factor-weighted likelihood; RF-CL, risk factor-weighted clinical likelihood; SDS, summed difference score.

Algorithm 3 used CACS-CL for reclassification of patients. With RF-CL as a reference, using algorithm 3 (CACS-CL) in patients with relevant ischemia (upper table), 107 (64.5%) patients were correctly reclassified to a higher probability. Eight patients (4.8%) were incorrectly reclassified to a lower probability.

In patients without ischemia (lower table), 425 (26.1%) patients were correctly reclassified a lower probability, and 464 (28.5%) patients incorrectly to a higher probability. The NRI was 0.5724 (0.4771-0.6677,  $P < .001$ ) in favor of algorithm 3.

**Table S5.** Baseline characteristics stratified by symptom status

|                                                 | Overall<br>(n = 1792) | Symptomatic<br>(n = 1301) | Asymptomatic<br>(n = 491) | <i>P</i> |
|-------------------------------------------------|-----------------------|---------------------------|---------------------------|----------|
| <i>Demographic and clinical characteristics</i> |                       |                           |                           |          |
| Age, y                                          | 65.4 ± 11.0           | 64.4 ± 11.0               | 68.1 ± 10.4               | < .001   |
| Female sex                                      | 762 (42.5)            | 601 (46.2)                | 161 (32.8)                | < .001   |
| BMI, kg/m <sup>2</sup>                          | 28.1 ± 5.7            | 28.1 ± 5.8                | 27.9 ± 5.7                | .486     |
| Stroke                                          | 76 (4.2)              | 37 (2.8)                  | 39 (7.9)                  | < .001   |
| COPD                                            | 82 (4.6)              | 45 (3.5)                  | 37 (7.5)                  | < .001   |
| Peripheral artery disease                       | 63 (3.5)              | 21 (1.6)                  | 42 (8.6)                  | < .001   |
| <i>Risk factors</i>                             |                       |                           |                           |          |
| Hypertension                                    | 788 (44.0)            | 450 (34.6)                | 338 (68.8)                | < .001   |
| Hypercholesterolemia                            | 645 (36.0)            | 374 (28.7)                | 271 (55.2)                | < .001   |
| Diabetes                                        | 375 (20.9)            | 264 (20.3)                | 111 (22.6)                | .313     |
| Smoking history                                 | 1025 (57.2)           | 713 (54.8)                | 312 (63.5)                | .001     |
| Family history of premature CAD                 | 206 (11.5)            | 132 (10.1)                | 74 (15.1)                 | .005     |
| <i>Symptoms</i>                                 |                       |                           |                           |          |
| Asymptomatic                                    | 491 (27.4)            | 0 (0.0)                   | 491 (100.0)               | < .001   |
| Nonanginal                                      | 204 (11.4)            | 204 (15.7)                | 0 (0.0)                   |          |
| Atypical angina                                 | 445 (24.8)            | 445 (34.2)                | 0 (0.0)                   |          |
| Typical angina                                  | 371 (20.7)            | 371 (28.5)                | 0 (0.0)                   |          |
| Dyspnea                                         | 281 (15.7)            | 281 (21.6)                | 0 (0.0)                   |          |
| <i>ECG findings</i>                             |                       |                           |                           |          |
| Sinus rhythm                                    | 1644 (91.7)           | 1202 (92.4)               | 442 (90.0)                | .126     |
| LBBB                                            | 78 (4.4)              | 50 (3.8)                  | 28 (5.7)                  | .112     |
| Q wave                                          | 70 (3.9)              | 53 (4.1)                  | 17 (3.5)                  | .014     |
| Abnormal repolarization                         | 222 (12.4)            | 146 (11.2)                | 76 (15.5)                 | .113     |

BMI, body mass index; CAD, coronary artery disease; COPD, chronic obstructive pulmonary disease; ECG, electrocardiographic; LBBB, left bundle branch block.

The data are expressed as No. (%) or mean ± standard deviation.

**Table S6.** Risk factor-weighted clinical likelihood and scan results stratified by symptom status

|                                  | All patients<br>(n = 1792) | Symptomatic patients<br>(n = 1301) | Asymptomatic patients<br>(n = 491) |
|----------------------------------|----------------------------|------------------------------------|------------------------------------|
| RF-CL $\leq$ 5%                  | 395 (22.0)                 | 277 (21.3)                         | 118 (24.0)                         |
| RF-CL < 15%                      | 1175 (65.6)                | 821 (63.1)                         | 354 (72.1)                         |
| Small ischemia (SDS $\leq$ 2)    | 354 (19.8)                 | 252 (19.4)                         | 102 (20.8)                         |
| Relevant ischemia (SDS $\leq$ 7) | 166 (9.3)                  | 122 (9.4)                          | 44 (9.0)                           |
| CACS                             | 74 [1, 413]                | 57 [0, 352]                        | 136 [7, 584]                       |

CACS, coronary artery calcium score; RF-CL, risk factor-weighted clinical likelihood; SDS, summed difference score.

The data are expressed as No. (%) or median [interquartile range].

**Table S7.** Test characteristics of algorithms in symptomatic patients only

|                    | Sensitivity         | Specificity     | NPV                 | PPV             | LR+ | LR-                 | DOR |
|--------------------|---------------------|-----------------|---------------------|-----------------|-----|---------------------|-----|
| <i>Algorithm 1</i> |                     |                 |                     |                 |     |                     |     |
| SDS 2              | 0.940 (0.904-0.964) | 1.000 (0.996-1) | 0.986 (0.977-0.991) | 1.000 (0.984-1) | NA  | 0.060 (0.036-0.097) | NA  |
| SDS 7              | 0.943 (0.886-0.972) | 1.000 (0.997-1) | 0.994 (0.988-0.997) | 1.000 (0.968-1) | NA  | 0.057 (0.028-0.118) | NA  |
| <i>Algorithm 2</i> |                     |                 |                     |                 |     |                     |     |
| SDS 2              | 0.917 (0.876-0.945) | 1.000 (0.996-1) | 0.980 (0.97-0.987)  | 1.000 (0.984-1) | NA  | 0.083 (0.055-0.126) | NA  |
| SDS 7              | 0.943 (0.886-0.972) | 1.000 (0.997-1) | 0.994 (0.988-0.997) | 1.000 (0.968-1) | NA  | 0.057 (0.028-0.118) | NA  |
| <i>Algorithm 3</i> |                     |                 |                     |                 |     |                     |     |
| SDS 2              | 0.933 (0.895-0.957) | 1.000 (0.996-1) | 0.984 (0.975-0.99)  | 1.000 (0.984-1) | NA  | 0.067 (0.043-0.107) | NA  |
| SDS 7              | 0.967 (0.919-0.987) | 1.000 (0.997-1) | 0.997 (0.991-0.999) | 1.000 (0.968-1) | NA  | 0.033 (0.013-0.086) | NA  |

DOR, diagnostic odds ratio; LR-, negative likelihood ratio; LR+, positive likelihood ratio; NPV, negative predictive value; PPV, positive predictive value; SDS, summed difference score.

**Table S8.** Performance of the 3 algorithms in symptomatic patients (n = 1301)

|                              | Algorithm 1 | Algorithm 2 | Algorithm 3 |
|------------------------------|-------------|-------------|-------------|
| <i>Performed tests</i>       |             |             |             |
| CACS                         | 1024        | 1024        | 1301        |
| PET                          | 1024        | 818         | 824         |
| <i>Missed diagnoses</i>      |             |             |             |
| Small ischemia               | 8 (0.6)     | 14 (1.1)    | 13 (1.0)    |
| Relevant ischemia            | 7 (0.5)     | 7 (0.5)     | 4 (0.3)     |
| Any ischemia                 | 15 (1.2)    | 21 (1.6)    | 17 (1.3)    |
| <i>Number needed to scan</i> |             |             |             |
| Small ischemia               | 87          | 62          | 77          |
| Relevant ischemia            | 186         | 186         | 325         |
| <i>Reduction</i>             |             |             |             |
| Radiation                    | 21.3        | 34.5        | 30.6        |
| Cost                         | 21.3        | 34.9        | 31.6        |
| <i>Test characteristics</i>  |             |             |             |
| Sensitivity                  | 94.0        | 91.7        | 93.3        |
| NPV                          | 98.6        | 98.0        | 98.4        |

CACS, coronary artery calcium score; NPV, negative predictive value; PET, positron emission tomography.

Data are presented as absolute numbers, No. (%), or percentages.

Small and relevant ischemia were defined as  $SDS \geq 2$  and  $SDS \geq 7$ , respectively. Test characteristics refer to the detection a small ischemia ( $SDS \geq 2$ ).

## References

1. Vrints C, Andreotti F, Koskinas KC, et al. 2024 ESC Guidelines for the management of chronic coronary syndromes. *Eur Heart J*. 2024;45:3415-3537.
2. Winther S, Schmidt SE, Mayrhofer T, et al. Incorporating Coronary Calcification Into Pre-Test Assessment of the Likelihood of Coronary Artery Disease. *J Am Coll Cardiol*. 2020;76:2421-2432.
